# Supplementary material for: Combining guilt-by-association and guilt-by-profiling to predict Saccharomyces cerevisiae gene function
Source: PubMed Central journal article supplement (PMC2447541; doi:10.1186/gb-2008-9-s1-s7), 2008-06-27
Supplement: gb-2008-9-s1-s7-S1.pdf [file gb-2008-9-s1-s7-S1.pdf]

**Supplementary Table 1.** Expert evaluation of GO predictions by *Funckenstein*.

| Gene Name               | Gene feature type | Predicted GO terms                                                            | Annotated ancestor GO terms | Expert evaluation   |
|-------------------------|-------------------|-------------------------------------------------------------------------------|-----------------------------|---------------------|
| <b>MF 3-10 genes</b>    |                   |                                                                               |                             |                     |
| YKL091C                 | Verified          | GO:0008526 "phosphatidylinositol transporter activity"                        | NO                          | highly unlikely     |
| MSH3                    | Verified          | GO:0032134 "mispaiored DNA binding"                                           | YES                         | highly unlikely     |
| TPS2                    | Verified          | GO:0003825 "alpha, alpha-trehalose-phosphate synthase (UDP-forming) activity" | YES                         | highly unlikely     |
| GYL1                    | Verified          | GO:0005097 "Rab GTPase activator activity"                                    | NO                          | likely true         |
| SHS1                    | Verified          | GO:0005545 "phosphatidylinositol binding"                                     | YES                         | likely true         |
| PUS9                    | Verified          | GO:0004730 "pseudouridylate synthase activity"                                | YES                         | unlikely to be true |
| PAC2                    | Verified          | GO:0008017 "microtubule binding"                                              | YES                         | unlikely to be true |
| CSE1                    | Verified          | GO:0008320 "protein carrier activity"                                         | YES                         | known true          |
| ALD4                    | Verified          | GO:0004028 "3-chloroallyl aldehyde dehydrogenase activity"                    | YES                         | unlikely to be true |
| ITC1                    | Verified          | GO:0003709 "RNA polymerase III transcription factor activity"                 | NO                          | unlikely to be true |
| <b>MF 11-30 genes</b>   |                   |                                                                               |                             |                     |
| YKL091C                 | Verified          | GO:0005319 "lipid transporter activity"                                       | NO                          | unclear             |
| UBC9                    | Verified          | GO:0004840 "ubiquitin conjugating enzyme activity"                            | YES                         | highly unlikely     |
| TPS2                    | Verified          | GO:0046527 "glucosyltransferase activity"                                     | YES                         | highly unlikely     |
| SHS1                    | Verified          | GO:0035091 "phosphoinositide binding"                                         | YES                         | likely true         |
| SLA2                    | Verified          | GO:0030276 "clathrin binding"                                                 | YES                         | known true          |
| MSH3                    | Verified          | GO:0030554 "adenyl nucleotide binding"                                        | YES                         | likely true         |
| PUS9                    | Verified          | GO:0016836 "hydro-lyase activity"                                             | YES                         | unlikely to be true |
| GYL1                    | Verified          | GO:0005099 "Ras GTPase activator activity"                                    | NO                          | likely true         |
| RPO21                   | Verified          | GO:0016455 "RNA polymerase II transcription mediator activity"                | YES                         | unlikely to be true |
| ARG80                   | Verified          | GO:0008301 "DNA bending activity"                                             | YES                         | known true          |
| <b>MF 31-100 genes</b>  |                   |                                                                               |                             |                     |
| SSY1                    | Verified          | GO:0005275 "amine transporter activity"                                       | YES                         | highly unlikely     |
| GYL1                    | Verified          | GO:0030695 "GTPase regulator activity"                                        | NO                          | likely true         |
| BPT1                    | Verified          | GO:0042626 "ATPase activity, coupled to transmembrane movement of substances" | NO                          | known true          |
| LSM1                    | Verified          | GO:0031202 "RNA splicing factor activity, transesterification mechanism"      | YES                         | highly unlikely     |
| SSE1                    | Verified          | GO:0051082 "unfolded protein binding"                                         | NO                          | known true          |
| NUT1                    | Verified          | GO:0016251 "general RNA polymerase II transcription factor activity"          | NO                          | known true          |
| SHS1                    | Verified          | GO:0005543 "phospholipid binding"                                             | YES                         | likely true         |
| YIR042C                 | Uncharacterized   | GO:0008415 "acyltransferase activity"                                         | NO                          | unclear             |
| TPS2                    | Verified          | GO:0016757 "transferase activity, transferring glycosyl groups"               | YES                         | highly unlikely     |
| DOC1                    | Verified          | GO:0016879 "ligase activity, forming carbon-nitrogen bonds"                   | YES                         | known true          |
| <b>MF 101-300 genes</b> |                   |                                                                               |                             |                     |

|                        |                 |                                                                                                 |     |                     |
|------------------------|-----------------|-------------------------------------------------------------------------------------------------|-----|---------------------|
| KIC1                   | Verified        | GO:0016773 "phosphotransferase activity, alcohol group as acceptor"                             | YES | known true          |
| IKS1                   | Uncharacterized | GO:0016772 "transferase activity, transferring phosphorus-containing groups"                    | NO  | likely true         |
| YEF3                   | Verified        | GO:0016887 "ATPase activity"                                                                    | NO  | known true          |
| NPR1                   | Verified        | GO:0004672 "protein kinase activity"                                                            | YES | known true          |
| BPT1                   | Verified        | GO:0016462 "pyrophosphatase activity"                                                           | NO  | known true          |
| GYL1                   | Verified        | GO:0030234 "enzyme regulator activity"                                                          | NO  | likely true         |
| YME1                   | Verified        | GO:0016817 "hydrolase activity, acting on acid anhydrides"                                      | YES | likely true         |
| SSE1                   | Verified        | GO:0017111 "nucleoside-triphosphatase activity"                                                 | NO  | known true          |
| CTF18                  | Verified        | GO:0016818 "hydrolase activity, acting on acid anhydrides, in phosphorus-containing anhydrides" | NO  | known true          |
| CLF1                   | Verified        | GO:0003723 "RNA binding"                                                                        | YES | known true          |
| <b>CC 3-10 genes</b>   |                 |                                                                                                 |     |                     |
| VPH1                   | Verified        | GO:0000221 "hydrogen-transporting ATPase V1 domain"                                             | YES | highly unlikely     |
| SUI2                   | Verified        | GO:0005851 "eukaryotic translation initiation factor 2B complex"                                | YES | highly unlikely     |
| SPT7                   | Verified        | GO:0005671 "Ada2/Gcn5/Ada3 transcription activator complex"                                     | YES | highly unlikely     |
| SHS1                   | Verified        | GO:0000399 "bud neck septin structure"                                                          | YES | known true          |
| TIF5                   | Verified        | GO:0005852 "eukaryotic translation initiation factor 3 complex"                                 | YES | highly unlikely     |
| RPG1                   | Verified        | GO:0043614 "multi-eIF complex"                                                                  | YES | known true          |
| VPS8                   | Verified        | GO:0030897 "HOPS complex"                                                                       | YES | unlikely to be true |
| LSM1                   | Verified        | GO:0005688 "snRNP U6"                                                                           | YES | highly unlikely     |
| RPN10                  | Verified        | GO:0008541 "proteasome regulatory particle, lid subcomplex (sensu Eukaryota)"                   | YES | unclear             |
| CHL4                   | Verified        | GO:0000817 "COMA complex"                                                                       | YES | unlikely to be true |
| <b>CC 11-30 genes</b>  |                 |                                                                                                 |     |                     |
| RPB3                   | Verified        | GO:0005736 "DNA-directed RNA polymerase I complex"                                              | YES | highly unlikely     |
| SHS1                   | Verified        | GO:0032153 "cell division site"                                                                 | YES | known true          |
| TAF1                   | Verified        | GO:0000124 "SAGA complex"                                                                       | YES | highly unlikely     |
| LSM4                   | Verified        | GO:0005682 "snRNP U5"                                                                           | YES | highly unlikely     |
| RPO21                  | Verified        | GO:0000119 "mediator complex"                                                                   | YES | highly unlikely     |
| PRE1                   | Verified        | GO:0005838 "proteasome regulatory particle (sensu Eukaryota)"                                   | YES | highly unlikely     |
| SPT3                   | Verified        | GO:0005669 "transcription factor TFIID complex"                                                 | YES | highly unlikely     |
| SPT8                   | Verified        | GO:0046695 "SLIK (SAGA-like) complex"                                                           | YES | highly unlikely     |
| LSM1                   | Verified        | GO:0046540 "U4/U6 x U5 tri-snRNP complex"                                                       | YES | highly unlikely     |
| PRP19                  | Verified        | GO:0005685 "snRNP U1"                                                                           | YES | highly unlikely     |
| <b>CC 31-100 genes</b> |                 |                                                                                                 |     |                     |
| PRP19                  | Verified        | GO:0030532 "small nuclear ribonucleoprotein complex"                                            | YES | highly unlikely     |
| SRP1                   | Verified        | GO:0031965 "nuclear membrane"                                                                   | YES | known true          |
| NGG1                   | Verified        | GO:0016591 "DNA-directed RNA polymerase II, holoenzyme"                                         | YES | highly unlikely     |
| CLF1                   | Verified        | GO:0005681 "spliceosome complex"                                                                | YES | known true          |
| TAF1                   | Verified        | GO:0000123 "histone acetyltransferase complex"                                                  | YES | known true          |
| ABP1                   | Verified        | GO:0015629 "actin cytoskeleton"                                                                 | YES | known true          |
| VMA10                  | Verified        | GO:0000329 "vacuolar membrane (sensu Fungi)"                                                    | YES | known true          |

|                         |          |                                                                                            |     |                     |
|-------------------------|----------|--------------------------------------------------------------------------------------------|-----|---------------------|
| LSM1                    | Verified | GO:0005684 "major (U2-dependent) spliceosome"                                              | YES | highly unlikely     |
| TID3                    | Verified | GO:0005819 "spindle"                                                                       | YES | known true          |
| SPC25                   | Verified | GO:0000922 "spindle pole"                                                                  | YES | known true          |
| <b>CC 101-300 genes</b> |          |                                                                                            |     |                     |
| SRP1                    | Verified | GO:0005635 "nuclear envelope"                                                              | YES | known true          |
| ABP1                    | Verified | GO:0044430 "cytoskeletal part"                                                             | YES | known true          |
| VMA10                   | Verified | GO:0000322 "storage vacuole"                                                               | YES | known true          |
| TID3                    | Verified | GO:0005856 "cytoskeleton"                                                                  | YES | known true          |
| SHS1                    | Verified | GO:0030427 "site of polarized growth"                                                      | YES | known true          |
| VMA2                    | Verified | GO:0000324 "vacuole (sensu Fungi)"                                                         | YES | known true          |
| SPC25                   | Verified | GO:0015630 "microtubule cytoskeleton"                                                      | YES | known true          |
| SEC18                   | Verified | GO:0005794 "Golgi apparatus"                                                               | YES | known true          |
| ERP1                    | Verified | GO:0016021 "integral to membrane"                                                          | YES | likely true         |
| RPO21                   | Verified | GO:0005667 "transcription factor complex"                                                  | YES | highly unlikely     |
| <b>BP 3-10 genes</b>    |          |                                                                                            |     |                     |
| MSH6                    | Verified | GO:0000735 "removal of nonhomologous ends"                                                 | YES | highly unlikely     |
| CFT2                    | Verified | GO:0030847 "transcription termination from Pol II promoter, RNA polymerase(A)-independent" | YES | unlikely to be true |
| RAD51                   | Verified | GO:0000730 "DNA recombinase assembly"                                                      | YES | unlikely to be true |
| GAL3                    | Verified | GO:0019388 "galactose catabolism"                                                          | YES | unlikely to be true |
| CDC2                    | Verified | GO:0000731 "DNA synthesis during DNA repair"                                               | YES | known true          |
| GLK1                    | Verified | GO:0006000 "fructose metabolism"                                                           | YES | unlikely to be true |
| YSH1                    | Verified | GO:0030846 "transcription termination from Pol II promoter, RNA polymerase(A) coupled"     | YES | unlikely to be true |
| GAL83                   | Verified | GO:0042149 "cellular response to glucose starvation"                                       | YES | known true          |
| MLH2                    | Verified | GO:0000710 "meiotic mismatch repair"                                                       | YES | highly unlikely     |
| DMC1                    | Verified | GO:0030491 "heteroduplex formation"                                                        | YES | known true          |
| <b>BP 11-30 genes</b>   |          |                                                                                            |     |                     |
| PEP12                   | Verified | GO:0006906 "vesicle fusion"                                                                | YES | known true          |
| EXO84                   | Verified | GO:0048278 "vesicle docking"                                                               | YES | known true          |
| SHS1                    | Verified | GO:0007120 "axial bud site selection"                                                      | YES | known true          |
| HDA1                    | Verified | GO:0016575 "histone deacetylation"                                                         | YES | known true          |
| STE20                   | Verified | GO:0007266 "Rho protein signal transduction"                                               | YES | known true          |
| RAD6                    | Verified | GO:0000209 "protein polyubiquitination"                                                    | YES | known true          |
| BOS1                    | Verified | GO:0006891 "intra-Golgi vesicle-mediated transport"                                        | YES | unlikely to be true |
| CFT2                    | Verified | GO:0006369 "transcription termination from RNA polymerase II promoter"                     | YES | unlikely to be true |
| GLC7                    | Verified | GO:0031123 "RNA 3'-end processing"                                                         | YES | known true          |
| <b>BP 31-100 genes</b>  |          |                                                                                            |     |                     |
| PEP12                   | Verified | GO:0006944 "membrane fusion"                                                               | YES | known true          |
| QRI8                    | Verified | GO:0032446 "protein modification by small protein conjugation"                             | YES | known true          |
| LSM1                    | Verified | GO:0000398 "nuclear mRNA splicing, via spliceosome"                                        | YES | highly unlikely     |

|                         |          |                                                                          |     |                     |
|-------------------------|----------|--------------------------------------------------------------------------|-----|---------------------|
| SSY1                    | Verified | GO:0015837 "amine transport"                                             | YES | known true          |
| RGD1                    | Verified | GO:0007264 "small GTPase mediated signal transduction"                   | YES | known true          |
| SHS1                    | Verified | GO:0000282 "bud site selection"                                          | YES | known true          |
| KSS1                    | Verified | GO:0006468 "protein amino acid phosphorylation"                          | YES | known true          |
| DOC1                    | Verified | GO:0006512 "ubiquitin cycle"                                             | YES | known true          |
| SPC97                   | Verified | GO:0007051 "spindle organization and biogenesis"                         | YES | known true          |
| CRM1                    | Verified | GO:0051170 "nuclear import"                                              | YES | highly unlikely     |
| <b>BP 101-300 genes</b> |          |                                                                          |     |                     |
| CDC3                    | Verified | GO:0051704 "interaction between organisms"                               | NO  | known true          |
| LSM1                    | Verified | GO:0008380 "RNA splicing"                                                | YES | highly unlikely     |
| SHS1                    | Verified | GO:0007047 "cell wall organization and biogenesis"                       | YES | known true          |
| TAF1                    | Verified | GO:0006325 "establishment and/or maintenance of chromatin architecture"  | YES | known true          |
| SRP1                    | Verified | GO:0006605 "protein targeting"                                           | YES | known true          |
| SPT8                    | Verified | GO:0016568 "chromatin modification"                                      | YES | known true          |
| RPA190                  | Verified | GO:0007046 "ribosome biogenesis"                                         | YES | highly unlikely     |
| NGG1                    | Verified | GO:0006357 "regulation of transcription from RNA polymerase II promoter" | YES | known true          |
| RLR1                    | Verified | GO:0000723 "telomere maintenance"                                        | YES | unlikely to be true |
| ESA1                    | Verified | GO:0006338 "chromatin remodeling"                                        | YES | known true          |
